# Supplementary material for: Do experimental projection methods outcompete retention time prediction models in non-target screening? A case study on LC/HRMS interlaboratory comparison data
Source: Analyst. 2025 Jul 8;150(16):3567–77. doi: 10.1039/d5an00323g (PMC12268317; doi:10.1039/d5an00323g)
Supplement: AN-150-D5AN00323G-s002 [file AN-150-D5AN00323G-s002.xlsx]

## Sheet: Table S1
CS information											Projection results												Prediction results
CS	LC instrument	Column	Column stationary phase	Column dimensions	Separation mechanism	Mobile phase A	Mobile phase B	Mobile phase C	Estimated pH of aqueous phase	Gradient program	Min RMSE	Max RMSE	Median RMSE	Min MAD	Max MAD	Med MAD	Min Q95	Max Q95	Median Q95	Min R2	Max R2	Median R2	RMSE	MAD	Q95	R2
DS_DX	1260 Infinity LC (Agilent Technologies Inc., Santa Clara, CA, USA)	Poroshell 120 EC (Agilent Technologies Inc.); ZIC-HILIC (Merck)	C18; HILIC	50 × 3 mm, 2.7 µm; 150 × 2.1 mm, 5 µm	RP; HILIC	10 mM ammonium acetate in H2O:MeCN 90:10; MeCN	MeCN:10 mM ammonium acetate in H2O 90:10; H2O	NA	NA	RP: 0 min: 0% B, 7 min: 0% B, 12 min: 50% B, 13 min: 50% B, 22 min: 100% B, 32 min: 100% B, 33 min: 0% B; HILIC: 0 min: 0% B, 6 min: 0% B, 13 min: 40% B, 32 min: 40% B, 33 min: 0% B, 54 min: 0% B	NA (not included in the analysis)	NA (not included in the analysis)	NA (not included in the analysis)	NA (not included in the analysis)	NA (not included in the analysis)	NA (not included in the analysis)	NA (not included in the analysis)	NA (not included in the analysis)	NA (not included in the analysis)	NA (not included in the analysis)	NA (not included in the analysis)	NA (not included in the analysis)	NA (not included in the analysis)	NA (not included in the analysis)	NA (not included in the analysis)	NA (not included in the analysis)
DS_GJT	Exion LC (Shimadzu Corporation, Tokyo, Japan)	ZORBAX Eclipse Plus (Agilent Technologies Inc.)	C8	100 × 2.1 mm, 1.8 µm	RP	0.1% formic acid in H2O with 2% MeOH and 0.5 mM ammonium formate	0.1% formic acid in MeOH with 1.9% H2O and 0.5 mM ammonium formate	NA	6	0 min: 0% B, 1 min: 0% B, 3 min: 30% B, 6 min: 50% B, 16 min: 100% B, 18 min: 100% B, 18.1 min: 0% B, 20.1 min: 0% B	52.2613	207.739	91.3343	32.3362	145.607	71.8862	78.6447	441.048	195.42	0.321851	0.9944	0.823451	219.692	189.982	410.759	0.118517
DS_QSB	Dionex UltiMate 3000 RSLC UHPLC (Thermo Fisher Scientific™, Bremen, Germany)	Acclaim RSLC (Thermo Fisher Scientific™); Acquity UPLC BEH VanGuard pre-column (Waters Corporation)	C18; C18	100 × 2.1 mm, 2.2 µm; 1.7 µm	RP	0.01% formic acid in H2O:MeOH 90:10 with 5 mM ammonium formate	0.01% formic acid in MeOH with 5 mM ammonium formate	NA	3.4	0 min: 1% B, 1 min: 1% B, 3 min: 39% B, 14 min: 99.9% B, 16 min: 99.9%B, 16.1 min: 1%B, 20 min: 1% B	32.8981	175.553	91.1411	20.0226	151.195	64.3396	62.7429	368.375	150.735	0.693474	0.988587	0.916951	205.435	253.797	376.38	0.547548
DS_AW	Nexera LC (Shimadzu Corporation, Tokyo, Japan)	(Phenomenex®)	C18	100 × 3 mm, 5 µm	RP	0.1% formic acid in H2O	0.1% formic acid in MeCN	NA	2.7	0 min: 5% B, 15 min: 100%, 17 min: 5% B	23.0326	163.356	69.0425	22.8297	137.963	65.4246	38.3229	307.985	127.858	0.437568	0.993077	0.917615	197.979	222.424	367.876	0.272244
DS_MT	Acquity UPLC (Waters Corporation, Wilmslow, UK)	BEH (Waters Corporation)	C18	100 × 2.1 mm, 1.7 µm	RP	0.1% formic acid in H2O	0.1% formic acid in MeCN	NA	2.8	0 min: 10% B, 16 min: 99% B, 21 min: 99% B, 21.1 min: 10% B, 24.1 min: 10% B	20.1895	168.013	61.7263	14.7175	137.437	45.8598	26.7727	305.965	121.294	0.680075	0.996113	0.950913	190.54	201.75	315.627	0.548368
DS_DP	Accela LC (Thermo Fisher Scientific™, Bremen, Germany)	Acquity UPLC BEH (Waters Corporation)	C18	150 × 2.1 mm, 1.7 µm	RP	0.1% formic acid in H2O	MeOH	NA	2.7	0 min: 10% B, 2 min: 10% B, 15 min: 100% B, 20 min: 100% B, 20.1 min: 10% B, 30 min: 10% B	6.73579	129.523	62.4286	8.67523	123.814	44.7153	10.3286	236.241	127.224	0.723948	0.999907	0.949262	183.96	168.317	378.37	0.643429
DS_DID	1290 Infinity II UPLC (Agilent Technologies Inc., Santa Clara, CA, USA)	Acquity UPLC HSS T3 (Waters Corporation)	Silica-based bonded	150 × 2.1 mm, 1.8 µm	RP	0.1% formic acid in H2O	0.1% formic acid in MeCN	NA	2.7	0 min: 5% B, 2 min: 5% B, 10 min: 15% B, 17 min: 50% B, 20 min: 60% B, 25 min: 70% B, 28 min: 90% B, 31 min: 90% B, 33 min: 5% B, 36 min: 5% B	20.3418	164.772	54.4713	12.0003	155.638	46.1651	43.0203	304.601	105.809	0.203579	0.997185	0.964518	181.277	133.032	350.554	0.605462
DS_QDJ	Acquity UPLC (Waters Corporation, Wilmslow, UK)	BEH (Waters Corporation)	C18	150 × 2.1 mm, 1.7 µm	RP	0.05% formic acid in H2O	0.05% formic acid in MeCN	NA	2.9	0 min: 2% B, 0.5 min: 2% B, 18.5 min: 99% B, 22.5 min: 99% B, 25 min: 2% B	21.0309	156.728	62.4235	14.771	112.126	34.9081	39.8816	313.746	129.576	0.521863	0.994351	0.949336	175.991	164.847	288.602	0.6231
DS_DBS	Vanquish LC (Thermo Fisher Scientific™, Bremen, Germany)	Acquity UPLC HSS T3 (Waters Corporation)	C18	150 × 3 mm, 1.8 µm	RP	0.1% formic acid in H2O	0.1% formic acid in MeCN	NA	2.66	0 min: 5% B, 2 min: 5% B, 13 min: 70% B, 15 min: 95% B, 18.25 min: 100% B, 20 min: 100% B, 20.5 min: 5% B, 23 min: 5% B	18.9637	146.537	72.1584	12.2049	123.573	50.6494	22.3996	381.275	104.514	0.655659	0.993844	0.917381	173.698	192.406	311.421	0.485381
DS_QQG	Acquity UHPLC (Waters Corporation, Wilmslow, UK)	CORTECS (Waters Corporation)	C18	100 × 2.1 mm, 2.7 µm	RP	0.1% formic acid in H2O	0.1% formic acid in MeOH	NA	2.7	0 min: 5% B, 7 min: 75% B, 10 min: 100% B, 15 min: 100% B, 17 min: 5% B, 21 min: 5% B	31.1564	169.246	68.1493	23.3291	99.3307	58.0383	62.6192	383.858	127.695	0.571918	0.989406	0.937452	172.888	164.917	345.353	0.468319
DS_TL	Infinity 1290 LC (Agilent Technologies Inc., Santa Clara, CA, USA)	Poroshell 120 EC (Agilent Technologies Inc.)	C18	150 × 3 mm, 2.7 µm	RP	0.1% formic acid in H2O	0.1% formic acid in MeCN	NA	2.74	0 min: 5% B, 15 min: 99% B, 17 min: 99% B, 17.1 min: 5% B, 22.1 min: 5% B	15.5293	150.134	62.5733	12.8531	116.019	49.1166	23.6521	255.362	119.085	0.731373	0.997011	0.931651	172.709	206.682	316.232	0.450905
DS_EF	Accela LC (Thermo Fisher Scientific™, Bremen, Germany)	Acquity UPLC BEH (Waters Corporation)	C18	150 × 2.1 mm, 1.7 µm	RP	0.1% formic acid in H2O	MeOH	NA	2.7	0 min: 10% B, 2 min: 10% B, 15 min: 100% B, 20 min: 100% B, 20.1 min: 10% B, 30 min: 10% B	6.73569	125.746	60.3832	8.67469	134.25	38.542	10.3279	229.201	121.625	0.738174	0.999907	0.946583	163.226	134.759	344.133	0.685342
DS_JDF	Dionex UltiMate™ 3000 UHPLC (Thermo Fisher Scientific™, Bremen, Germany)	Hypersil GOLD aQ (Thermo Fisher Scientific™)	C18	100 × 2.1 mm, 1.9 µm	RP	0.1% formic acid in H2O	0.1% formic acid in MeOH	NA	2.6	0 min: 0% B, 1 min: 0% B, 8 min: 100% B, 12 min: 100% B, 13 min: 0% B, 19 min: 0% B	15.2604	136.073	62.5679	9.64269	125.719	43.3718	31.6531	268.004	92.9875	0.643804	0.995531	0.929478	161.593	157.18	284.886	0.450649
DS_JWW	Dionex UltiMate™ 3000 UHPLC (Thermo Fisher Scientific™, Bremen, Germany)	Easy-spray PepMap RSLC (Thermo Fisher Scientific™)	C18	150 × 0.05 mm, 2 µm	RP	0.1% formic acid and 2% MeCN in H2O	0.1% formic acid in 98% MeCN	NA	2.7	0 min: 10% B, 2 min: 10% B, 17 min: 95% B, 27 min: 95% B, 27.5 min: 10% B, 40 min: 10% B	14.343	205.437	67.9526	11.9967	150.124	59.728	27.426	386.942	117.924	0.279041	0.995564	0.83814	161.072	160.433	306.051	0.288885
DS_TSF	Dionex UltiMate™ 3000 UHPLC (Thermo Fisher Scientific™, Bremen, Germany)	RRHD Eclipse Plus (Agilent Technologies Inc.)	C18	150 × 2.1 mm, 1.8 µm	RP	0.1% formic acid in H2O	0.1% formic acid in MeCN	NA	3	0 min: 2% B, 1 min: 2% B, 2 min: 20% B, 16 min: 100% B, 24 min: 100% B, 25 min: 2% B, 30 min: 2% B	6.9733	133.964	52.9677	5.41889	121.324	37.4728	12.9042	297.723	89.903	0.655845	0.999103	0.940088	159.258	150.142	304.07	0.48782
DS_QDF	Dionex UltiMate™ 3000 UHPLC (Thermo Fisher Scientific™, Bremen, Germany)	Kinetex EVO (Phenomenex®)	C18	150 × 3 mm, 2.6 µm	RP	0.1% formic acid in H2O	MeCN	NA	2.7	0 min: 5% B, 20min: 100% B, 25 min: 100% B, 25.1 min: 5% B, 30 min: 5% B	6.8462	157.013	88.4738	2.67251	92.2652	44.2026	14.0895	287.334	131.995	0.505041	0.999008	0.826536	157.945	172.803	318.508	0.319242
DS_VQL	Acquity UPLC (Waters Corporation, Wilmslow, UK)	Kinetex EVO (Phenomenex®)	C18	150 × 3 mm, 2.6 µm	RP	0.1% formic acid in H2O	MeCN	NA	2.7	0 min: 5% B, 20 min: 100% B, 25 min: 100% B, 25.1 min: 5% B, 30 min: 5% B	6.9283	150.799	86.2323	2.68238	109.848	46.0628	14.3533	287.988	133.794	0.607487	0.998963	0.854206	157.013	164.644	324.227	0.439726
DS_JBB	1290 Infinity II UHPLC (Agilent Technologies Inc., Santa Clara, CA, USA)	ZORBAX Eclipse Plus (Agilent Technologies Inc.)	C18	100 × 2.1 mm, 1.8 µm	RP	0.1% formic acid in H2O	MeCN	NA	3	0 min: 5% B, 0.5 min: 5% B, 15.5 min: 100%B, 18.5 min: 100% B, 18.6 min: 5% B, 20.6 min: 5% B	12.708	129.151	57.2898	12.517	112.159	47.4979	18.5698	266.134	109.909	0.701045	0.998554	0.946805	154.298	152.939	268.536	0.589649
DS_TSJ	1100 LC (Agilent Technologies Inc., Santa Clara, CA, USA)	Hypersil GOLD (Thermo Fisher Scientific™)	C18	100 × 2.1 mm, 3 µm	RP	0.05% formic acid in H2O	0.05% formic acid in MeOH	NA	4	0 min: 5 % B, 25 min: 95% B, 30 min: 95% B, 30.1 min: 5% B, 40.1 min: 5% B	22.6054	111.624	61.9501	15.7235	80.6362	48.305	45.0366	253.095	108.262	0.74499	0.993943	0.947694	153.154	184.113	263.286	0.681042
DS_BQW	U3000 RSLC HPG (Thermo Fisher Scientific™, Bremen, Germany)	Intensity solo (Bruker Daltonics)	C18	100 × 2.1 mm, 1.8 µm	RP	0.1% formic acid in H2O	MeCN	NA	2.5	0 min: 5% B, 15 min: 100% B, 17 min: 100% B, 17.1 min: 5% B, 22.1 min: 5% B	13.468	118.67	50.8649	11.3617	100.337	42.0942	19.4734	243.814	85.3819	0.765557	0.998526	0.95777	149.971	157.172	252.164	0.588954
DS_ITG	Vanquish UPLC (Thermo Fisher Scientific™, Bremen, Germany)	XBridge BEH (Waters Corporation)	C18	150 × 2.1 mm, 2.5 µm	RP	0.05% formic acid in H2O	0.05% formic acid in MeCN	NA	2.9	0 min: 5% B, 1 min: 5% B, 25 min: 95% B, 29 min: 95% B, 29.5 min: 5% B, 34 min: 5% B	13.9196	96.2271	54.4819	11.2264	89.8725	44.0956	24.8269	208.01	101.96	0.838511	0.997173	0.964285	144.776	140.179	243.358	0.668916
DS_HT	Dionex UltiMate™ 3000 UHPLC (Thermo Fisher Scientific™, Bremen, Germany)	ZORBAX Eclipse Plus (Agilent Technologies Inc.)	C18	150 × 2.1 mm, 3.5 µm	RP	0.1% formic acid in H2O	0.1% formic acid in MeCN	NA	2.6	0 min: 1% B, 1 min: 1% B, 2 min: 20% B, 16.5 min: 98% B, 22 min:98% B, 22.1 min: 1% B, 27 min: 1% B	7.43521	146.463	56.3793	5.0649	80.6144	39.4373	14.3837	288.791	95.8221	0.662712	0.999	0.938235	144.645	130.113	294.447	0.513899
DS_QV	Dionex UltiMate™ 3000 DGP 3600RS (Thermo Fisher Scientific™, Bremen, Germany)	Atlantis T3 (Waters Corporation)	C18	150 × 3 mm, 3 µm	RP	0.1% formic acid in H2O	0.1% formic acid in MeOH	Isopropanol	2.5	0 min: 0% B + 0% C, 1.5 min: 0% B + 0 % C, 18.5 min: 95% B + 0% C, 23 min: 95% B + 0% C, 23.5 min: 90% B + 5% C, 28.5 min: 90% B + 5% C, 32 min: 0% B + 0% C, 44 min: 0% B + 0% C	29.0627	141.244	54.3018	32.4121	116.186	61.2867	48.0464	300.549	94.813	0.576135	0.988737	0.932537	140.305	183.081	228.986	0.445594
DS_GSB	Vanquish UPLC (Thermo Fisher Scientific™, Bremen, Germany)	Acquity HSS T3 (Waters Corporation)	C18	150 × 2.1 mm, 1.8 µm	RP	0.1% formic acid in H2O	0.1% formic acid in MeOH	NA	2.7	0 min: 2% B, 1 min: 2% B, 16 min: 98% B, 21 min: 98% B, 22 min: 2% B, 28 min: 2% B	14.3264	101.949	53.8304	0.913291	74.111	46.6308	5.45808	200.071	100.201	0.77315	0.996567	0.948571	139.742	168.781	265.484	0.62957
DS_JL	Vanquish LC (Thermo Fisher Scientific™, Bremen, Germany)	(Phenomenex®)	C6-phenyl	150 × 3 mm, 3 µm	RP	0.025% formic acid in H2O with 5 mM ammonium formate	0.025% formic acid in 85% MeOH and 15% isopropanol with 5 mM ammonium formate	NA	3	0 min: 8% B, 2.5 min: 8% B, 21.5 min: 98% B, 28 min: 98% B, 28.1 min: 8% B, 33.1 min: 8% B	65.0275	135.253	87.6441	38.2153	95.7218	53.972	125.355	282.402	189.698	0.656447	0.943517	0.887008	136.69	160.196	238.065	0.687273
DS_GS	Vanquish UPLC (Thermo Fisher Scientific™, Bremen, Germany)	ZORBAX RR Eclipse Plus (Agilent Technologies Inc.)	C18	150 × 2.1 mm, 3.5 µm	RP	0.1% formic acid in H2O	0.1% formic acid in MeOH	NA	2.7	0 min: 2% B, 1 min: 2% B, 20 min: 98% B, 25 min: 98% B, 25.1 min: 2% B, 30.1 min: 2% B	21.7374	116.781	55.9899	12.7701	79.0052	36.5788	44.2243	239.906	116.063	0.800949	0.989278	0.952083	133.791	156.339	256.194	0.649545
DS_YF	Dionex UltiMate™ 3000 UHPLC (Thermo Fisher Scientific™, Bremen, Germany)	Raptor AR (Restek™)	C18	100 × 2.1 mm, 2.6 µm	RP	0.1% formic acid in H2O	0.1% formic acid in MeCN	NA	2.7	0 min: 13% B, 0.5 min: 13% B, 10 min: 50% B, 10.75 min: 50% B, 14.25 min: 95% B, 14.75 min: 13% B, 18.75 min: 13% B	25.6869	108.915	60.2962	22.4881	88.0519	43.0803	54.6675	218.756	125.544	0.687849	0.982922	0.942286	132.895	125.629	337.575	0.649242
DS_BIJ	Acquity UPLC (Waters Corporation, Wilmslow, UK)	Purospher STAR (Merck)	C18	150 × 2.1 mm, 2 µm	RP	0.1% formic acid in H2O	0.1% formic acid in MeCN	NA	2.7	0 min: 5% B, 1 min: 5% B, 18 min: 97% B, 20.5 min: 97% B, 21.5 min: 5% B, 25 min: 5% B	23.3427	132.41	55.9053	14.2068	119.777	45.0145	49.3185	262.538	95.7885	0.719573	0.990406	0.937033	131.529	157.792	222.318	0.541805
DS_QBD	Nexera Prominence HPLC (Shimadzu Corporation, Tokyo, Japan)	ZORBAX Eclipse Plus (Agilent Technologies Inc.)	C18	150 × 2.1 mm	RP	0.1% formic acid in H2O	0.1% formic acid in MeCN	NA	2.6	0 min: 2% B, 1 min: 2% B, 2 min: 20% B, 16.5 min: 100% B, 27 min: 100% B, 27.1 min: 2% B, 37.1 min: 2% B	8.24965	129.906	43.626	5.8523	138.409	32.8174	15.5325	275.328	75.8924	0.707886	0.998869	0.94744	130.853	112.092	238.866	0.566623
DS_STF	Vanquish LC system (Thermo Fisher Scientific™, Bremen, Germany)	Kinetex (Phenomenex®)	Biphenyl	100 × 3 mm, 2.7 µm	RP	0.02% formic acid in H2O with 0.2 mM ammonium formate	MeOH	NA	3	0 min: 20% B, 25 min: 100% B, 37 min: 100% B, 37.01 min: 0% B, 45 min: 0% B	53.5509	134.478	73.1111	46.475	124.493	73.2356	88.761	275.569	140.388	0.663698	0.937891	0.874725	129.659	170.187	207.691	0.578624
DS_Q	Dionex UltiMate™ 3000 UHPLC (Thermo Fisher Scientific™, Bremen, Germany)	Hypersil GOLD aQ (Thermo Fisher Scientific™)	C18	100 × 2.1 mm, 1.9 µm	RP	0.1% formic acid in H2O	0.1% formic acid in MeCN	NA	2.7	0 min: 5% B, 9 min: 99% B, 13 min: 99% B, 13.1 min: 5% B, 15.1 min: 5% B	24.9534	97.8517	51.854	15.6714	102.198	46.2178	39.6699	201.805	97.3118	0.777781	0.988439	0.946249	123.27	136.202	213.596	0.584184
DS_TDF	Vanquish UPLC (Thermo Fisher Scientific™, Bremen, Germany)	Acquity HSS T3 (Waters Corporation)	C18	150 × 2.1 mm, 1.8 µm	RP	0.1% formic acid in H2O	0.1% formic acid in MeOH	NA	2.7	0 min: 2% B, 1 min: 2% B, 16 min: 98% B, 21 min: 98% B, 22 min: 2% B, 28 min: 2% B	14.3432	109.649	53.5982	0.90789	85.8069	49.4316	5.44898	210.541	95.2072	0.78621	0.996557	0.950414	120.633	144.655	205.258	0.600584
DS_QJS	Dionex UltiMate™ 3000 UHPLC (Thermo Fisher Scientific™, Bremen, Germany)	BEH (Waters Corporation)	C18	50 × 2.1 mm, 1.7 µm	RP	1 mM ammonium fluoride in H2O	MeOH	NA	5.6	0 min: 5% B, 3 min: 5% B, 4 min: 60% B, 14 min: 60% B, 14.1 min: 98% B, 17.1 min: 98% B, 17.2 min: 5% B, 23.2 min: 5% B	33.9939	199.367	92.5787	13.6622	208.604	66.1361	71.8406	424.551	198.103	0.163812	0.992655	0.755072	114.18	63.5946	190.092	0.724935
DS_QQT	Acquity I UPLC (Waters Corporation, Wilmslow, UK)	Acquity BEH (Waters Corporation)	C18	100 × 2.7 mm, 1.7 µm	RP	10 mM ammonium acetate in H2O	10 mM ammonium acetate in MeOH	NA	6.75	0 min: 2% B, 0.25 min: 2% B, 12.25 min: 99% B, 13 min: 99% B, 13.01 min: 2% B, 17 min: 2% B	35.1027	207.125	107.691	33.1561	195.472	83.6197	65.3629	444.429	220.351	0.292871	0.989611	0.801033	113.074	116.203	202.566	0.796485
DS_JSG	Ultimate 3000 LC (Thermo Fisher Scientific™, Bremen, Germany)	Acclaim RSLC 120 (Thermo Fisher Scientific™); UPLC BEH VanGuard pre-column (Waters Corporation)	C18; C18	100 × 2.1 mm, 2.2 µm; 5 × 2.1 mm, 1.7 µm	RP	5 mM ammonium formate buffer in H2O:MeOH (90:10 v/v-%)	5 mM ammoniumformate buffer in MeOH	NA	4.3	0 min: 1% B, 14 min: 100% B, 15.5 min: 100% B, 15.6 min: 1% B, 19.1 min: 1% B	12.6542	139.843	82.5966	10.7181	109.017	52.162	25.2052	329.423	178.557	0.431233	0.997992	0.884341	101.461	101.148	186.259	0.76448
DS_TJQ	LC30AD (Shimadzu Corporation, Tokyo, Japan)	Kinetex EVO (Phenomenex®)	C18	100 × 2.1 mm, 2.6 µm	RP	0.1% formic acid in H2O	MeCN	NA	2.7	0 min: 5% B, 15 min: 100% B, 20 min: 100% B, 20.1 min: 5% B, 27.1 min: 5% B	34.4751	127.827	61.8889	23.577	128.666	62.9326	65.97	227.657	109.621	0.723188	0.980856	0.932431	99.5393	105.415	171.924	0.755494
DS_JBQ	U3000 RSLC HPG (Thermo Fisher Scientific™, Bremen, Germany)	Intensity solo (Bruker Daltonics)	C18	100 × 2.1 mm, 1.8 µm	RP	0.1% formic acid in 99:1 H2O:MeOH mixture with 5 mM ammonium formate	0.1% formic acid in MeOH with 5 mM ammonium formate	NA	3.9	0 min: 4% B, 1 min: 18.3%, 2.5 min: 50% B, 14 min: 99.9% B, 16 min: 99.9% B, 16.1 min: 4% B, 20.1 min: 4% B	11.7654	146.261	83.0528	9.83685	140.96	56.7598	22.8363	334.232	162.912	0.310732	0.997412	0.870417	93.0713	75.8564	196.253	0.752027
DS_AWW	Nexera X2 LC (Shimadzu Corporation, Tokyo, Japan)	Acquity UPLC HSS T3 (Waters Corporation)	C18	50 × 2.1 mm, 1.8 µm	RP	95% H2O, 5% MeOH, 5mM ammonium formate	95% MeOH, 5% H2O, 5 mM ammonium formate	NA	3	0 min: 0% B, 2 min: 0% B, 14 min: 100% B, 16 min: 100% B, 16.1 min: 0% B, 20.1 min: 0% B	13.0626	180.412	99.2249	9.51325	212.392	73.3127	26.6043	404.361	221.81	0.288455	0.996742	0.859571	86.7855	104.66	156.978	0.82165
